# Supplementary material for: Development of a quantitative method to measure EV uptake
Source: PubMed Central journal article supplement (PMC6642168; doi:10.1038/s41598-019-47023-9), 2019-07-19
Supplement: 41598_2019_47023_MOESM1_ESM.pdf [file 41598_2019_47023_MOESM1_ESM.pdf]

## Development of a quantitative method to measure EV uptake.

**Authors:** Víctor Toribio<sup>1</sup>, Sara Morales<sup>2</sup>, Soraya López-Martín<sup>1,2</sup>, Beatriz Cardeños<sup>3</sup>, Carlos Cabañas<sup>3</sup> and María Yáñez-Mó<sup>1,2,3\*</sup>.

### A. CD9 and CD63 cDNA PCR

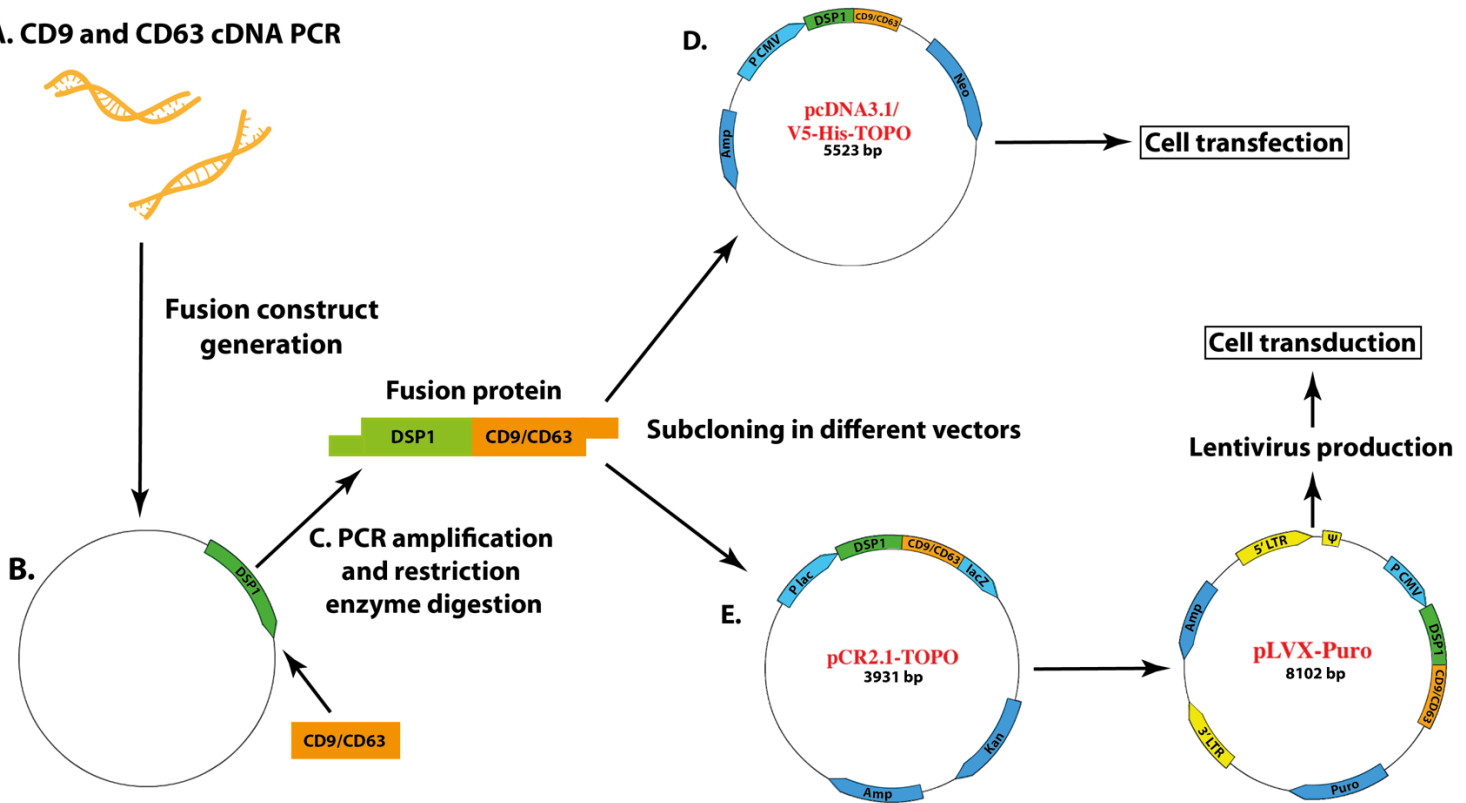

**Supplementary Figure 1S. DSP1-CD9/CD63 fusion constructs design.** A. CD9 and CD63 human cDNA sequences were amplified by PCR using specific oligonucleotides (C). Tetraspanin full coding sequence (CD9 or CD63) was inserted in reading frame after DSP1 C-terminus (B). The fusion protein constructs, as well as DSP1 and DSP2 were amplified by PCR for subsequent cloning into two different vectors (D and E). D. DSP1-CD9/CD63 subcloning into pcDNA 3.3-TOPO vector allows for direct cell transfection. E. Subcloning into PCR 2.1-TOPO vector provided EcoR1 restriction sites for the final subcloning into pLVX-PURO lentiviral vector. HEK293 cells were transfected with pLVX-Puro vectors to produce lentiviral particles for viral transduction of cells with DSP1, DSP1-CD9/CD63 and DSP2.

Cell lysates

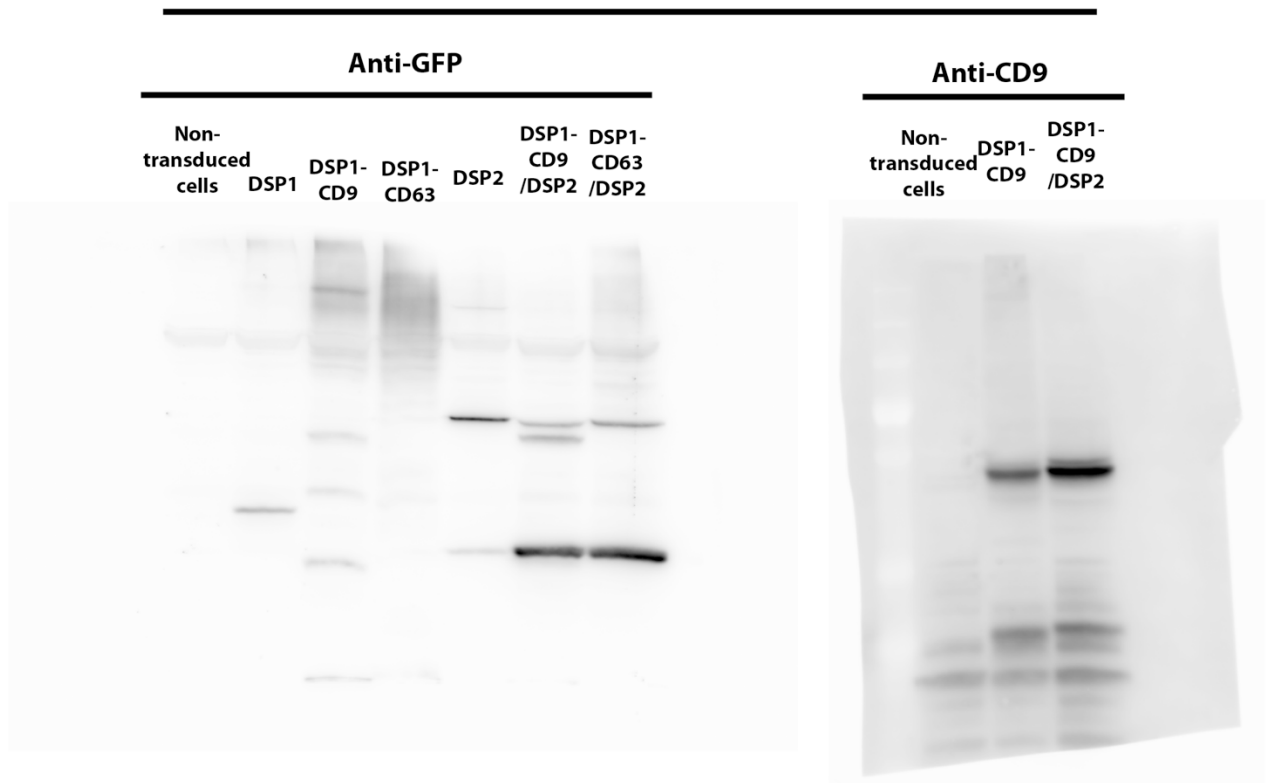

EVs lysates

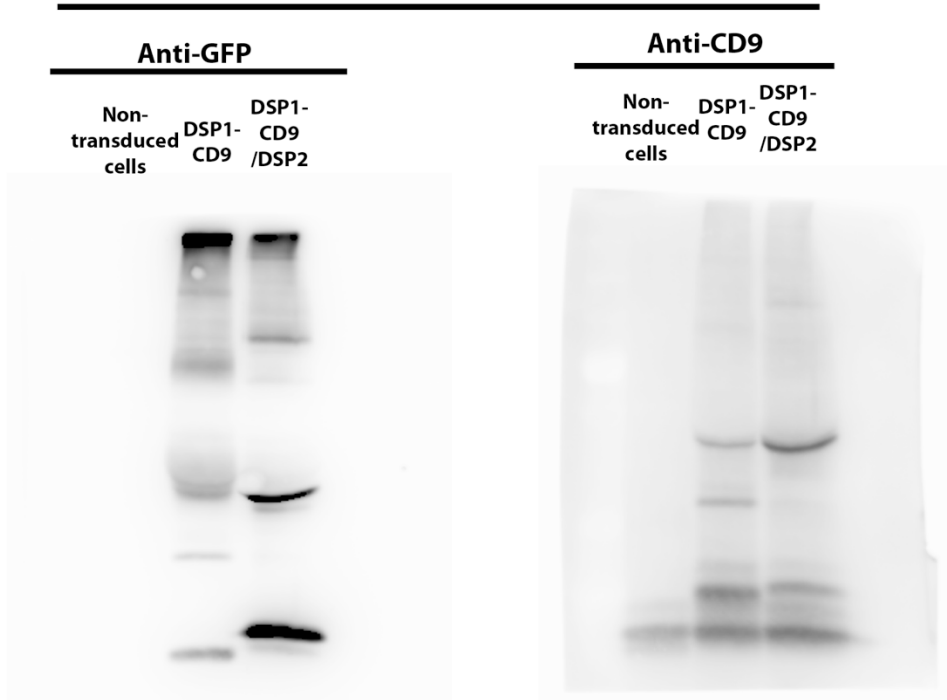

Supplementary Figure 2S. Original full-length gels of the western-blot shown in Figure 1D and E

|                          | <b>Interaction Anova Table</b> |                           |                     |                     |                |
|--------------------------|--------------------------------|---------------------------|---------------------|---------------------|----------------|
| <b>Figure</b>            | <b>Sum of Squares</b>          | <b>Degrees of Freedom</b> | <b>Mean Squares</b> | <b>F (DFn, DFd)</b> | <b>P value</b> |
| <b>Figure 3A</b>         | 1,18E+09                       | 6                         | 1,97E+08            | F (6, 35) = 34.46   | P < 0.0001     |
| <b>Figure 3B</b>         | 6,89E+08                       | 16                        | 4,31E+07            | F (16,36) = 9.72    | P < 0.0001     |
| <b>Figure 3C</b>         | 9,54E+08                       | 12                        | 7,95E+07            | F (12, 48) = 118.7  | P < 0.0001     |
| <b>Figure 4A (left)</b>  | 8,67E+08                       | 12                        | 7,23E+07            | F (12, 48) = 110.9  | P < 0.0001     |
| <b>Figure 4A (right)</b> | 8,16E+09                       | 24                        | 3,40E+08            | F (24, 54) = 15.63  | P < 0.0001     |
| <b>Figure 4B</b>         | 2,21E+10                       | 24                        | 9,20E+08            | F (24, 78) = 6.506  | P < 0.0001     |
| <b>Figure 5A</b>         | 8,16E+09                       | 24                        | 3,40E+08            | F (24, 54) = 15.46  | P < 0.0001     |
| <b>Figure 5B</b>         | 3,05E+01                       | 20                        | 1,52E+00            | F (20, 64) = 24.91  | P < 0.0001     |

**Supplementary Table.** Interaction, F-values and degrees of freedom of the ANOVA analyses from all graphs.
